# Supplementary material
Source: publisher figshare collection journal article supplement (https://rs.figshare.com/ndownloader/files/14769893)

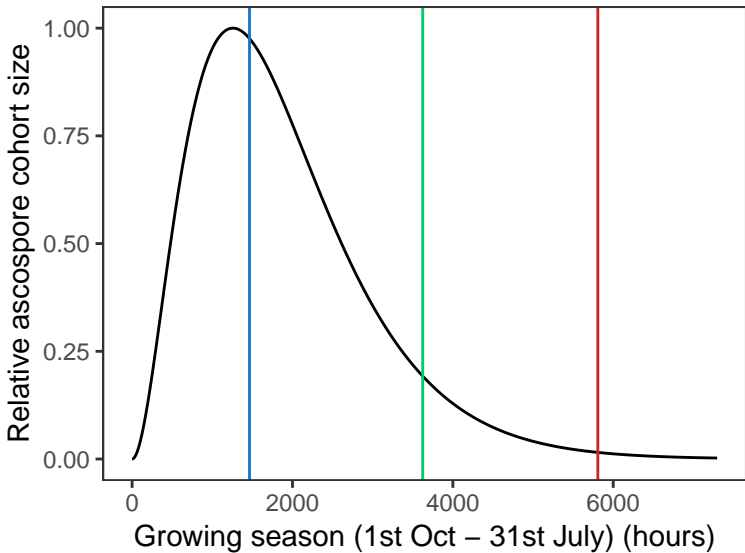

Supplement: Supplementary file [file 14769893]
